# Supplementary material for: MicroRNA-155 is a potential molecular marker of natural killer/T-cell lymphoma
Source: PubMed Central journal article supplement (PMC5288223; doi:10.18632/oncotarget.10780), 2016-07-22
Supplement: oncotarget-07-53808-s001.pdf [file oncotarget-07-53808-s001.pdf]

# MicroRNA-155 is a potential molecular marker of natural killer/T-cell lymphoma

## SUPPLEMENTARY FIGURE AND TABLES

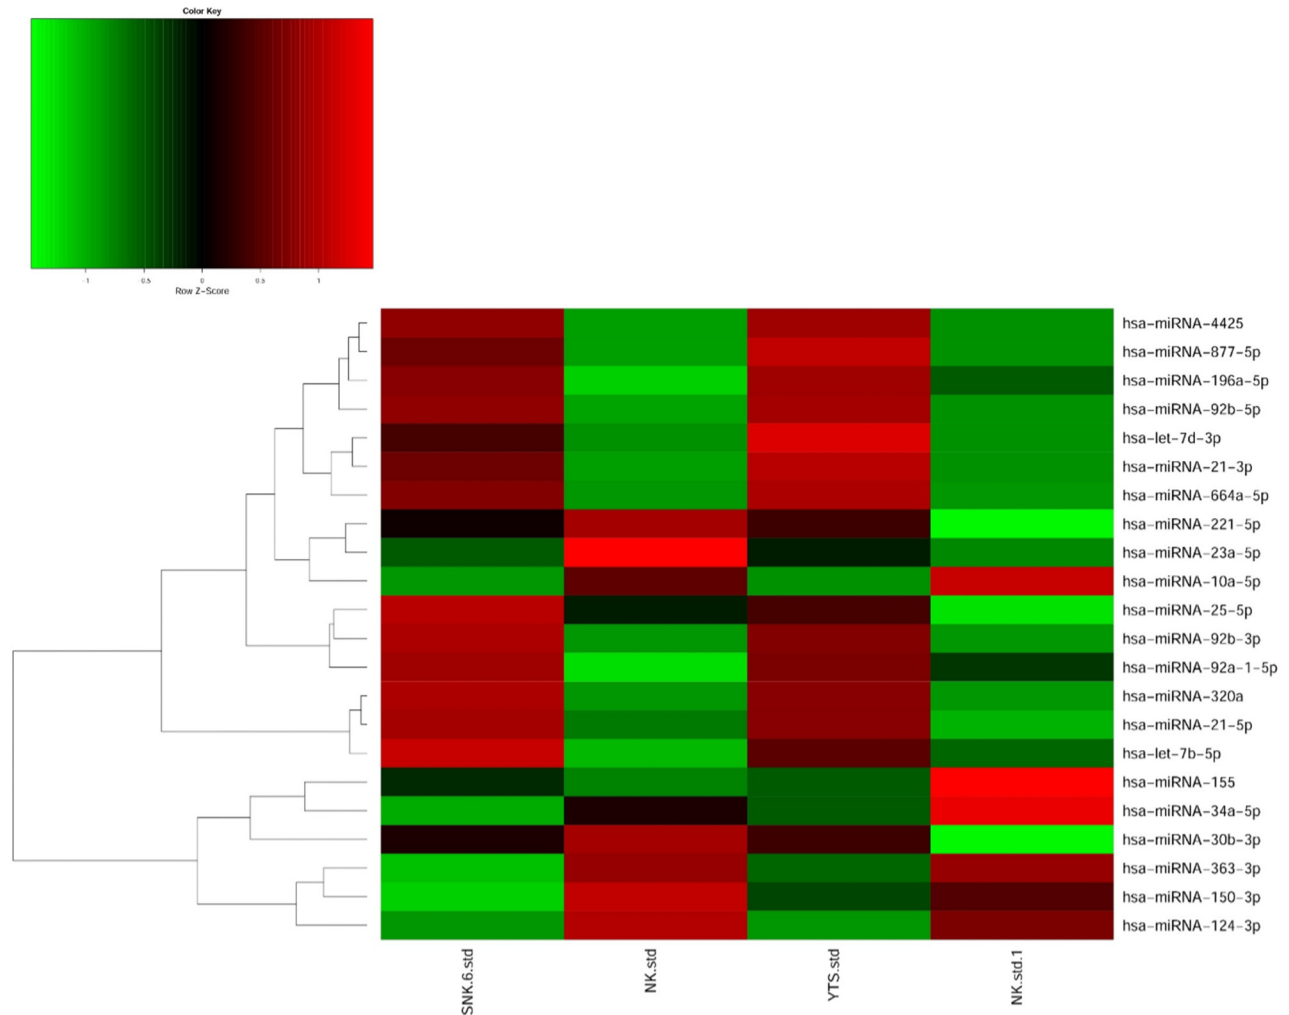

Supplementary Figure S1: Heatmap of differential expression of small RNAs in NK, SNK-6, and YTS cells

Supplementary Table S1: Summary of miRNA primers used in real-time RT-PCR

| name             | sequence 5' -3'                                                 |
|------------------|-----------------------------------------------------------------|
| miRNA-155-RT     | GTCGTATCCAGTGCAGGGTCCGAGGTATTTCGCACTGGATACGACACCCCT             |
| miRNA-155-qPCR-f | GCGCCGTTAATGCTAATCGTGAT                                         |
| miRNA-155-qPCR-r | GTGCAGGGTCCGAGGT                                                |
| miRNA221-RT      | GTCGTATCCAGTGCAGGGTCCGAGGTATTTCGCACTGGATACGACGAAACC             |
| miRNA221-qPCR-f  | GTCTCGAGCTACATTGTCTGCTG                                         |
| miRNA221-qPCR-r  | GTGCAGGGTCCGAGGT                                                |
| miRNA21-RT       | GTCGTATCCAGTGCAGGGTCCGAGGTATTTCGCACTGGATACGACTCAACA             |
| miRNA21-qPCR-f   | CCC CGTAGCTTATCAGACTGA                                          |
| miRNA21-qPCR-r   | GTGCAGGGTCCGAGGT                                                |
| miRNA34a-RT      | GTCGTATCCAGTGCAGGGTCCGAGGTATTTCGCACTGGATACGACACAACC             |
| miRNA34a-qPCR-f  | GCTGCCTGGCAGTGTCTTAG                                            |
| miRNA34a-qPCR-r  | GTGCAGGGTCCGAGGT                                                |
| miRNA34b-RT      | GTCGTATCCAGTGCAGGGTCCGAGGTATTTCGCACTGGATACGACCAATCA             |
| miRNA34b-qPCR-f  | CCGGGCAGGCAGTGTGTCAT                                            |
| miRNA34b-qPCR-r  | GTGCAGGGTCCGAGGT                                                |
| miRNA34c-RT      | GTCGTATCCAGTGCAGGGTCCGAGGTATTTCGCACTGGATACGACGCAATC             |
| miRNA34c-qPCR-f  | GCCCCGAGGCAGTGTAGT                                              |
| miRNA34c-qPCR-r  | GTGCAGGGTCCGAGGT                                                |
| RNT6-RT          | GTCGTATCCAGTGCAGGGTCCGAGGTATTTCGCACTGGATACGACACAAAATATGGAACGCTT |
| RNT6-qPCR-f      | GTGCTCGCTTCGGCAGCACA                                            |
| RNT6-qPCR-r      | AACGCTTCACGAATTTGCGT                                            |

Supplementary Table S2: Expression of candidate miRNAs in SNK-6 cells and NK cells

| miRNA-name         | SNK-6-std  | NK-std    | fold-change<br>(log2 SNK-6/NK) | p-value    |
|--------------------|------------|-----------|--------------------------------|------------|
| hsa-miRNA-1246     | 2997.7324  | 8.0255    | 8.54506                        | 0          |
| hsa-miRNA-92b-5p   | 522.2202   | 19.6624   | 4.73115                        | 0          |
| hsa-miRNA-92a-1-5p | 2855.4799  | 139.3756  | 4.35668                        | 0          |
| hsa-miRNA-340-5p   | 148.7712   | 7.8917    | 4.23662                        | 1.78E-246  |
| hsa-miRNA-92b-3p   | 1293.3099  | 80.5222   | 4.00554                        | 0          |
| hsa-miRNA-424-3p   | 170.2105   | 12.0382   | 3.82163                        | 4.24E-261  |
| hsa-miRNA-196a-5p  | 286.6779   | 24.4777   | 3.54989                        | 0          |
| hsa-miRNA-4425     | 470.7949   | 57.7834   | 3.02637                        | 0          |
| hsa-miRNA-664a-5p  | 64.4627    | 8.1592    | 2.98197                        | 3.65E-80   |
| hsa-miRNA-21-3p    | 137.4721   | 17.5223   | 2.97187                        | 2.13E-168  |
| hsa-miRNA-21-3p    | 137.4721   | 17.5223   | 2.97187                        | 2.13E-168  |
| hsa-miRNA-503-5p   | 182.6684   | 24.6114   | 2.89183                        | 5.60E-217  |
| hsa-miRNA-532-3p   | 42.5888    | 5.8853    | 2.85529                        | 3.09E-51   |
| hsa-miRNA-320a     | 34998.8947 | 5879.8572 | 2.57346                        | 0          |
| hsa-miRNA-92a-3p   | 3525.6021  | 631.7379  | 2.48047                        | 0          |
| hsa-miRNA-21-5p    | 29169.8741 | 6155.6657 | 2.24449                        | 0          |
| hsa-miRNA-877-5p   | 304.3508   | 65.8088   | 2.20938                        | 1.91E-264  |
| hsa-miRNA-25-5p    | 2223.0212  | 519.9164  | 2.09617                        | 0          |
| hsa-let-7b-5p      | 19029.386  | 4499.0759 | 2.08053                        | 0          |
| hsa-miRNA-17-3p    | 269.5844   | 64.4712   | 2.06401                        | 4.58E-215  |
| hsa-miRNA-320c     | 70.6917    | 17.121    | 2.04577                        | 4.27E-57   |
| hsa-miRNA-128      | 1283.3145  | 319.146   | 2.00759                        | 0          |
| hsa-miRNA-155      | 3.1869     | 0.9363    | 1.76711                        | 0.002624   |
| hsa-miRNA-32-5p    | 8.257      | 2.6752    | 1.62597                        | 3.89E-06   |
| hsa-let-7d-3p      | 99.6637    | 32.9044   | 1.59879                        | 3.13E-57   |
| hsa-miRNA-30b-3p   | 3.9112     | 8.0255    | -1.03698                       | 0.00143377 |
| hsa-miRNA-148a-3p  | 2.8972     | 6.8216    | -1.23545                       | 0.00073543 |
| hsa-miRNA-221-5p   | 50.4113    | 140.4456  | -1.47819                       | 1.81E-70   |
| hsa-miRNA-15a-5p   | 21.5841    | 76.3757   | -1.82314                       | 3.78E-52   |
| hsa-miRNA-625-3p   | 15.9346    | 75.4394   | -2.24316                       | 6.19E-67   |
| hsa-miRNA-10a-5p   | 14.3411    | 71.8279   | -2.32439                       | 1.48E-66   |
| hsa-miRNA-23a-5p   | 23.4673    | 198.3628  | -3.07942                       | 3.93E-245  |
| hsa-miRNA-150-3p   | 0.01       | 79.8534   | -12.96314                      | 2.71E-170  |
| hsa-miRNA-363-3p   | 0.01       | 88.6814   | -13.11442                      | 4.84E-189  |
| hsa-miRNA-124-3p   | 0.01       | 419.4643  | -15.35626                      | 0          |
| hsa-miRNA-34a-5p   | 0.1449     | 6.8216    | -5.55698                       | 8.80E-14   |

**Supplementary Table S3: Candidate miRNA expression in YTS cells and NK cells**

**See Supplementary File 1**
